# Supplementary material for: 7-Day National Institutes of Health Stroke Scale as a surrogate marker predicting ischemic stroke patients’ outcome following endovascular therapy
Source: PubMed Central journal article supplement (PMC10590605; doi:10.1515/tnsci-2022-0307), 2023-10-19
Supplement: tnsci-2022-0307-sm.pdf [file tnsci-2022-0307-sm.pdf]

## Supplementary material

**Table S1:** 90-day mRS in patients with 7-day NIHSS  $\leq 6$  versus NIHSS  $> 6$

|             | NIHSS $\leq 6$ | NIHSS $> 6$ | $\chi^2$ | <i>P</i> |
|-------------|----------------|-------------|----------|----------|
| mRS 0, n, % | 40 (36.04)     | 1 (0.80)    | 137.486  | < 0.001  |
| mRS 1, n, % | 41 (36.94)     | 6 (4.80)    |          |          |
| mRS 2, n, % | 17 (15.32)     | 12 (9.60)   |          |          |
| mRS 3, n, % | 3 (2.70)       | 9 (7.20)    |          |          |
| mRS 4, n, % | 4 (3.60)       | 42 (33.60)  |          |          |
| mRS 5, n, % | 2 (1.80)       | 23 (18.40)  |          |          |
| mRS 6, n, % | 4 (3.60)       | 32 (25.60)  |          |          |

NIHSS, National Institutes of Health Stroke Scale.
